# Supplementary material for: A Bibliometric and Visualization Analysis of Motor Learning in Preschoolers and Children over the Last 15 Years
Source: MDPI journal article supplement (doi:10.3390/healthcare10081415), 2022-07-28
Supplement: s1 [file s1]

**Supplementary S1.** Specific search process table.

| Set | Result    | Topic                                                                                                                                                            |
|-----|-----------|------------------------------------------------------------------------------------------------------------------------------------------------------------------|
| #20 | 418       | #15 NOT #19                                                                                                                                                      |
| #19 | 1,450,474 | #16 OR #17 OR #18                                                                                                                                                |
| #18 | 652,442   | TOPIC: ("rat ") Indexes=SCI-EXPANDED, SSCI, A&HCI, ESCI, CCR-EXPANDED, IC. Document Types= Article OR Review. Language =English. Timespan =01/01/1975-           |
| #17 | 935,699   | TOPIC: ("mice ") Indexes=SCI-EXPANDED, SSCI, A&HCI, ESCI, CCR-EXPANDED, IC. Document Types= Article OR Review. Language =English. Timespan =01/01/1975-          |
| #16 | 935,712   | TOPIC: ("mouse") Indexes=SCI-EXPANDED, SSCI, A&HCI, ESCI, CCR-EXPANDED, IC. Document Types= Article OR Review. Language =English. Timespan =01/01/1975-          |
| #15 | 499       | #13 AND #14                                                                                                                                                      |
| #14 | 5,864     | TOPIC: ("motor learning") Indexes=SCI-EXPANDED, SSCI, A&HCI, ESCI, CCR-EXPANDED, IC. Document Types= Article OR Review. Language =English. Timespan =01/01/1975- |
| #13 | 1,025,072 | #8 NOT #12                                                                                                                                                       |
| #12 | 1,339,806 | #9 OR #10 OR #11                                                                                                                                                 |
| #11 | 9,936     | TOPIC: ("teenager") Indexes=SCI-EXPANDED, SSCI, A&HCI, ESCI, CCR-EXPANDED, IC. Document Types= Article OR Review. Language =English. Timespan =01/01/1975-       |
| #10 | 300,214   | TOPIC: ("adolescent") Indexes=SCI-EXPANDED, SSCI, A&HCI, ESCI, CCR-EXPANDED, IC. Document Types= Article OR Review. Language =English. Timespan =01/01/1975-     |
| #9  | 1,115,877 | TOPIC: ("adult") Indexes=SCI-EXPANDED, SSCI, A&HCI, ESCI, CCR-EXPANDED, IC. Document Types= Article OR Review. Language =English. Timespan =01/01/1975-          |
| #8  | 1,396,888 | #1 OR #2 OR #3 OR #4 OR #5 OR #6 OR #7 OR #8                                                                                                                     |
| #7  | 177,633   | TOPIC: ("young child*") Indexes=SCI-EXPANDED, SSCI, A&HCI, ESCI, CCR-EXPANDED, IC. Document Types= Article OR Review. Language =English. Timespan =01/01/1975-   |
| #6  | 182,037   | TOPIC: ("early child*") Indexes=SCI-EXPANDED, SSCI, A&HCI, ESCI, CCR-EXPANDED, IC. Document Types= Article OR Review. Language =English. Timespan =01/01/1975-   |
| #5  | 10,473    | TOPIC: ("kindergarten") Indexes=SCI-EXPANDED, SSCI, A&HCI, ESCI, CCR-EXPANDED, IC. Document Types= Article OR Review. Language =English. Timespan =01/01/1975-   |
| #4  | 22,488    | TOPIC: ("pupil") Indexes=SCI-EXPANDED, SSCI, A&HCI, ESCI, CCR-EXPANDED, IC. Document Types= Article OR Review. Language =English. Timespan =01/01/1975-          |
| #3  | 313,573   | TOPIC: ("kid*") Indexes=SCI-EXPANDED, SSCI, A&HCI, ESCI, CCR-EXPANDED, IC. Document Types= Article OR Review. Language =English. Timespan =01/01/1975-           |
| #2  | 41,896    | TOPIC: ("preschool*") Indexes=SCI-EXPANDED, SSCI, A&HCI, ESCI, CCR-EXPANDED, IC. Document Types= Article OR Review. Language =English. Timespan =01/01/1975-     |
| #1  | 1,087,823 | TOPIC: ("child*") Indexes=SCI-EXPANDED, SSCI, A&HCI, ESCI, CCR-EXPANDED, IC. Document Types= Article OR Review. Language =English. Timespan =01/01/1975-         |

**Table of the Specific search process.** Note: Indexes=SCI-EXPANDED, SSCI, A&HCI, ESCI, CCR-EXPANDED, IC.

Document Types= Article OR Review. Language =English. Timespan =01/01/1975-
